# Supplementary material
Source: publisher site journal article supplement (https://e-cmh.org/upload/media/cmh-2022-0019-suppl11.pdf)
Supplement: Supplementary file 1 [file cmh-2022-0019-suppl11.pdf]

**Supplementary Table 5.** List of primary and secondary antibodies used in this study

|                           | Company                   | Catalog number |
|---------------------------|---------------------------|----------------|
| <b>Primary antibody</b>   |                           |                |
| $\alpha$ -SMA             | Abcam                     | ab124964       |
| GSK3 $\beta$              | Cell signaling technology | 9315           |
| p-GSK3 $\beta$            | Cell signaling technology | 9336           |
| IRS-1                     | Santa Cruz Biotechnology  | sc-560         |
| p-IRS-1                   | Abcam                     | ab5599         |
| Fibronectin-1             | Abcam                     | ab2413         |
| $\beta$ -actin            | Santa Cruz Biotechnology  | sc-47778       |
| IL-1 $\beta$              | Abcam                     | ab9722         |
| p-AKT                     | Cell signaling technology | 9271           |
| AKT                       | Cell signaling technology | 9272           |
| IGFBP-1                   | Santa Cruz Biotechnology  | sc-55474       |
| DPP-4/CD26                | Santa Cruz Biotechnology  | sc-52642       |
| IL-6R                     | Abcam                     | ab83053        |
| <b>Secondary antibody</b> |                           |                |
| Goat anti-rabbit          | GenDEPOT                  | SA002          |
| Goat anti-mouse           | GenDEPOT                  | SA001          |

$\alpha$ -SMA,  $\alpha$ -smooth muscle actin; GSK3B, glycogen synthase kinase-3 beta; P-GSK3B, phosphorylated glycogen synthase kinase-3 beta; IRS1, insulin receptor substrate 1; P-IRS1, phosphorylated insulin receptor substrate 1; IL, interleukin; P-AKT, phosphorylated protein kinase B; IGFBP, insulin-like growth factor-binding protein; DPP, dipeptidyl peptidase.
